# Supplementary material for: Regioselective plasmonic nano-assemblies for bimodal sub-femtomolar dopamine detection
Source: Royal Society of Chemistry journal article supplement (doi:10.1039/c6nr08264e), 2016-11-23
Supplement: c6nr08264e1.pdf [file c6nr08264e1.pdf]

1 **Regioselective plasmonic nano-assemblies for bimodal sub-**  
2 **femtomolar dopamine detection**

3 Fengli Gao, Liqiang Liu, Gang Cui, Liguang Xu, Xiaoling Wu\*, Hua Kuang, Chuanlai  
4 Xu\*

5  
6 *State Key Lab of Food Science and Technology, School of Food Science and Technology, Jiangnan University,*  
7 *Wuxi, JiangSu, 214122, PRC*

8  
9  
10  
11  
12  
13

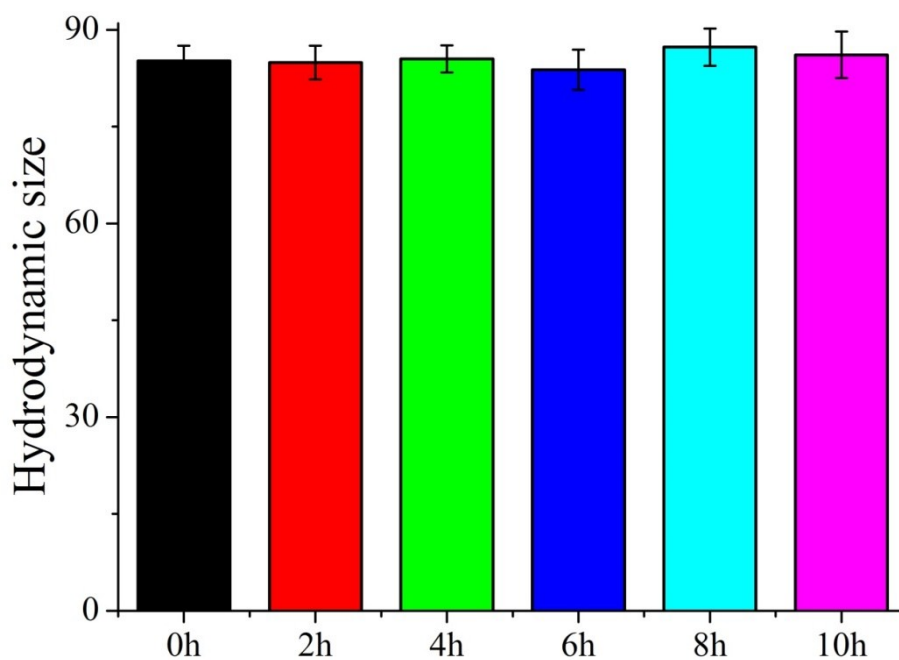

14

15 **Fig. S1** Hydrodynamic size of Au@AgNP-AuNR assemblies in the absence of DA

16 for different hours.

17

18

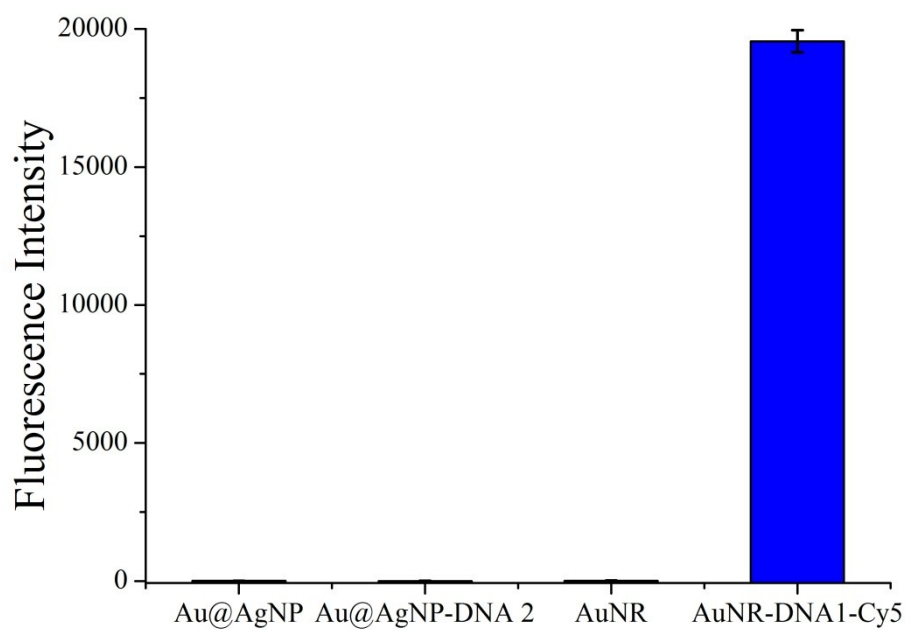

1

2 **Fig. S2** Fluorescence intensity of the monomers and other controls of Au@AgNP-

3 AuNR assemblies in the absence of DA.

4

1

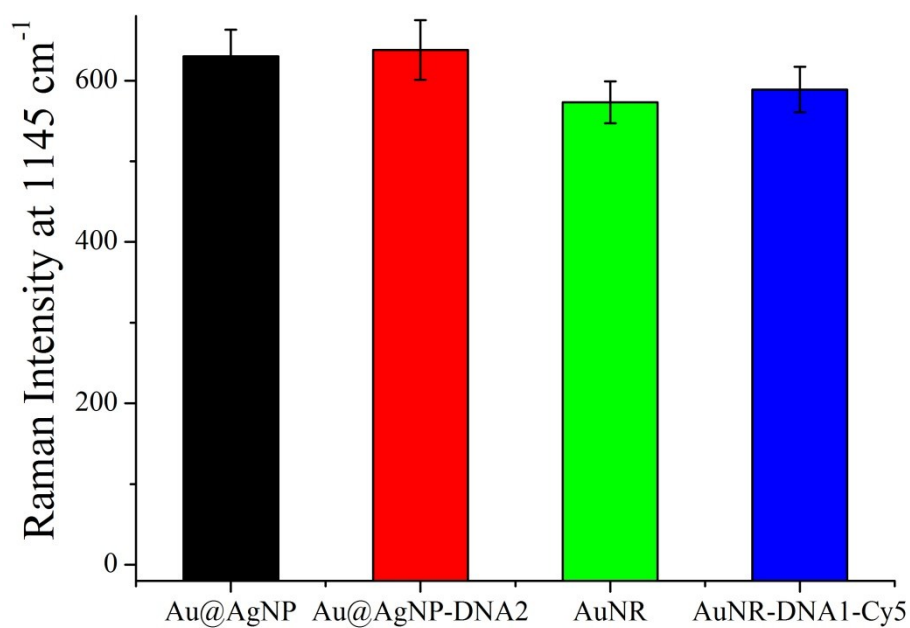

2

3 **Fig. S3** SERS intensity of the monomers and other controls of Au@AgNP-AuNR

4 assemblies in the absence of DA. The final concentration of 4-ATP was 10  $\mu$ M for all

5 these controls.

6

1  
2

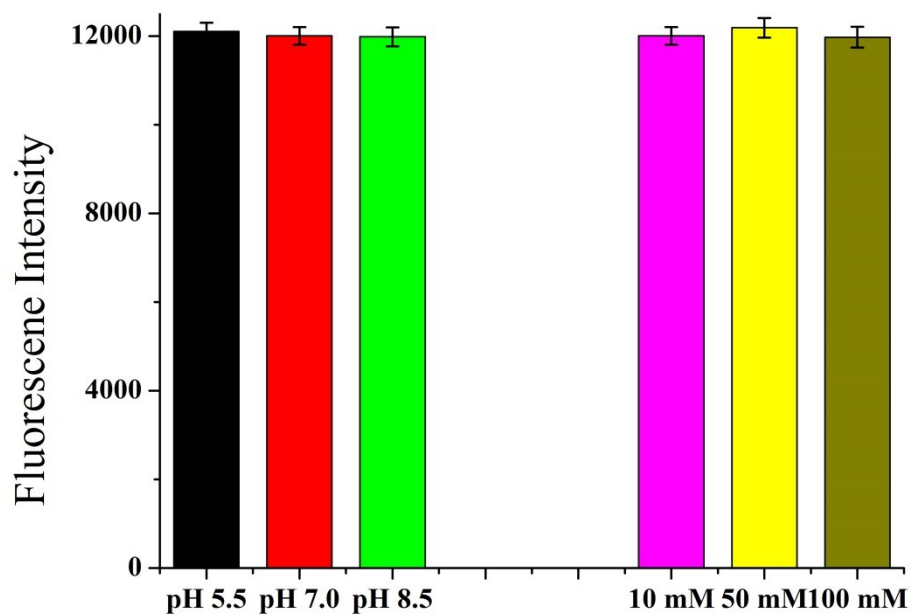

3

4 **Fig. S4** Fluorescence intensity of the Au@AgNP-AuNR assemblies at different  
5 conditions of PB buffer, in the presence of 0.5 fM DA. If it was not specifically noted,  
6 the pH and concentration of PB buffer was pH 7.0 and 10 mM.

7

1  
2

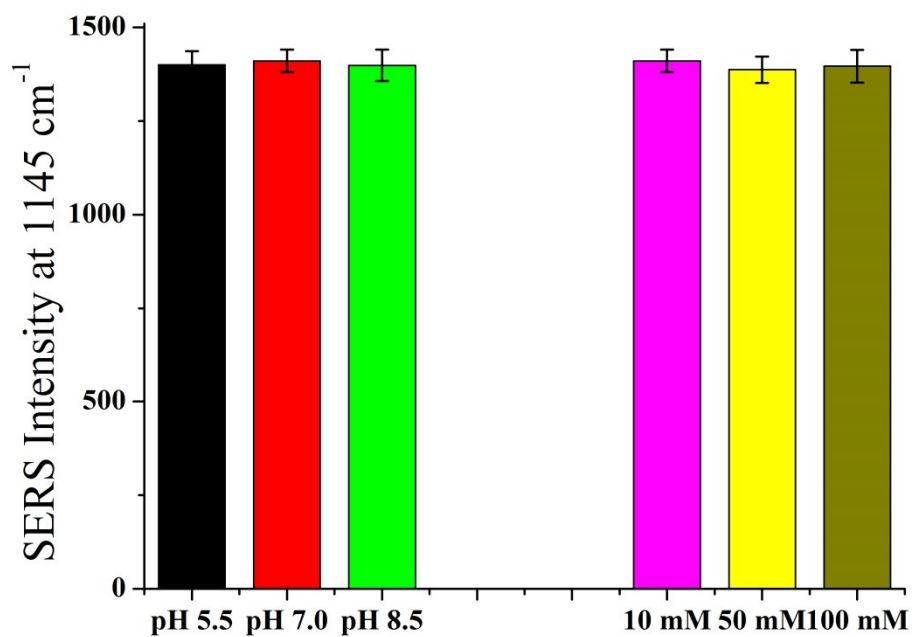

3  
4 **Fig. S5** SERS intensity of the Au@AgNP-AuNR assemblies at different conditions of  
5 PB buffer, in the presence of 0.5 fM DA. If it was not specifically noted, the pH and  
6 concentration of PB buffer was pH 7.0 and 10 mM.

7  
8
